# Supplementary material for: Unlimited recyclable wearable sensors based on a homogeneous ionic liquid and polyvinyl alcohol network
Source: Royal Society of Chemistry journal article supplement (doi:10.1039/d2su00040g), 2023-01-01
Supplement: d2su00040g2.pdf [file d2su00040g2.pdf]

## Supporting Information

### Unlimited Recyclable Wearable Sensors Based on Ionic Liquid and Polyvinyl Alcohol Network

**Yuhao Huang<sup>a</sup>, Yuqi Wang<sup>a</sup>, Xinyi Guan<sup>a</sup>, Bowen Shi<sup>a</sup>, Xi Wang<sup>a</sup>,  
Anura Fernando<sup>a</sup> and Xuqing Liu<sup>\*a</sup>**

<sup>a</sup> Department of Materials, University of Manchester, Manchester M13 9PL, U.K.

\* Corresponding author. E-mail: [Xuqing.liu@manchester.ac.uk](mailto:Xuqing.liu@manchester.ac.uk)

Keywords: Recyclable, ionic conductive, wearable sensors

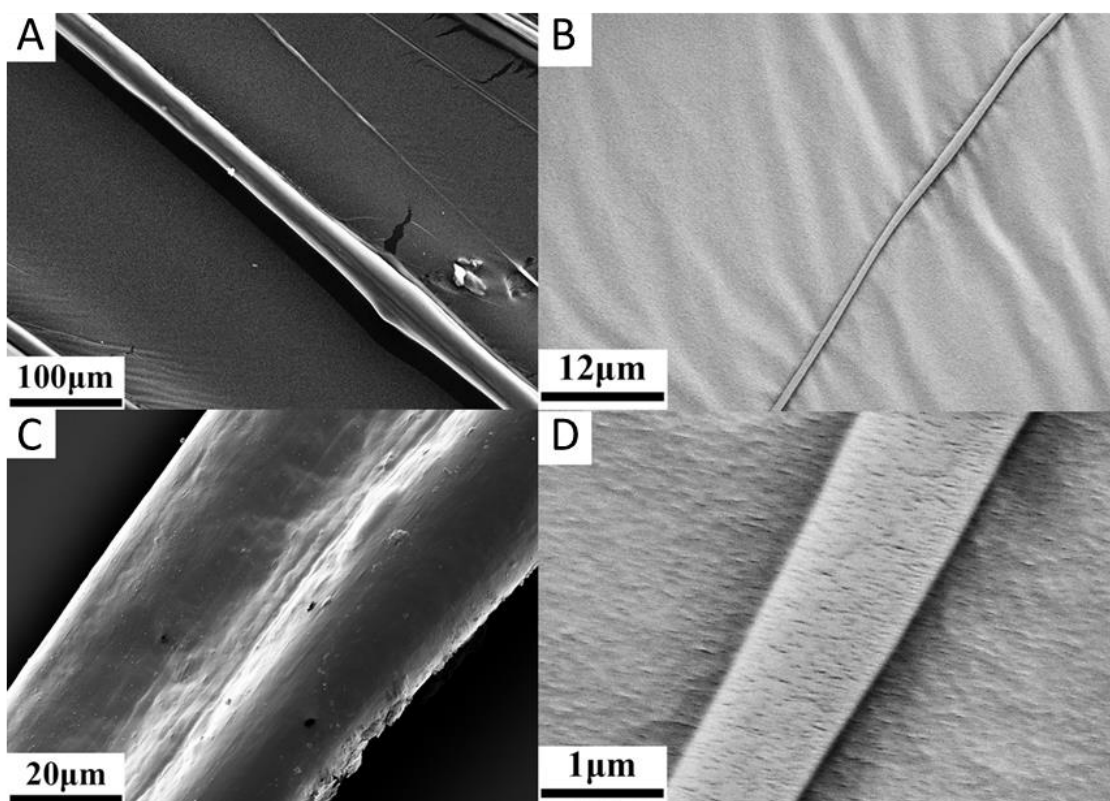

Figure S1. SEM images of PVA/Br-IL fibres at different magnifications.

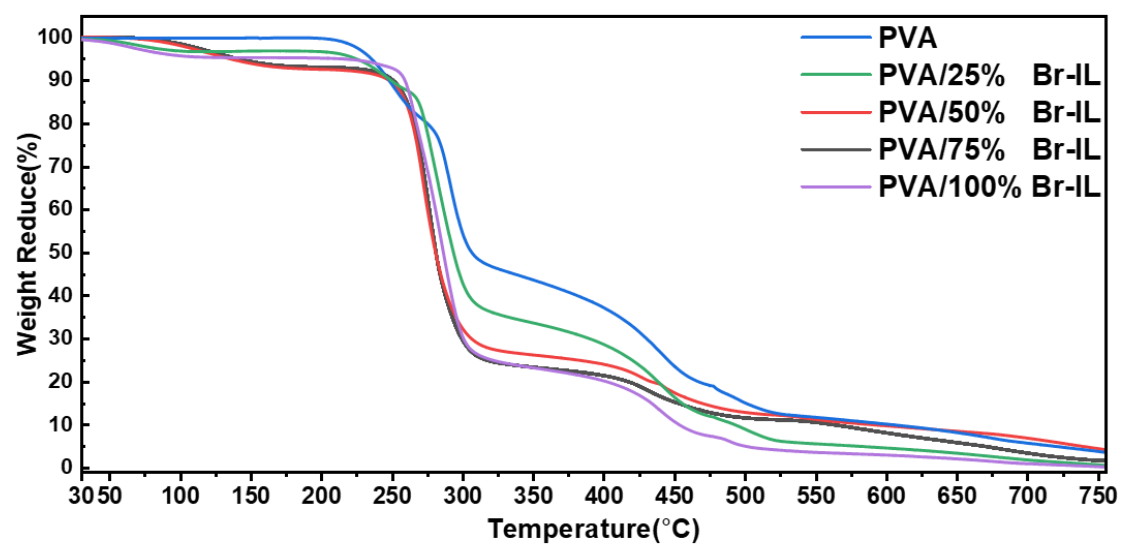

Figure S2. TGA measurements on pure PVA films and PVA films modified by different concentrations of Br-IL.

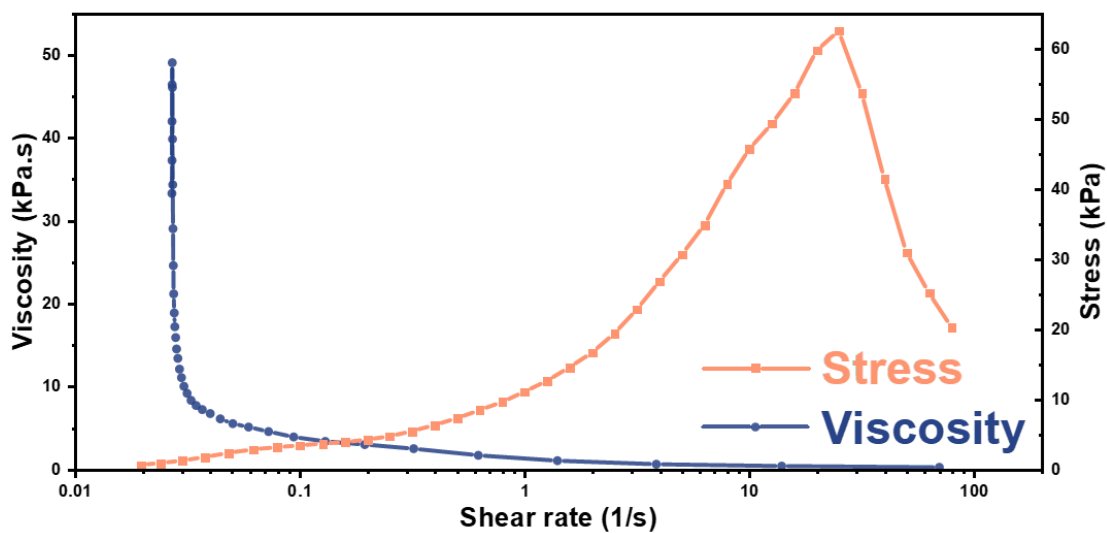

Figure S3. Rheology measurement on PVA/100% Br-IL film.

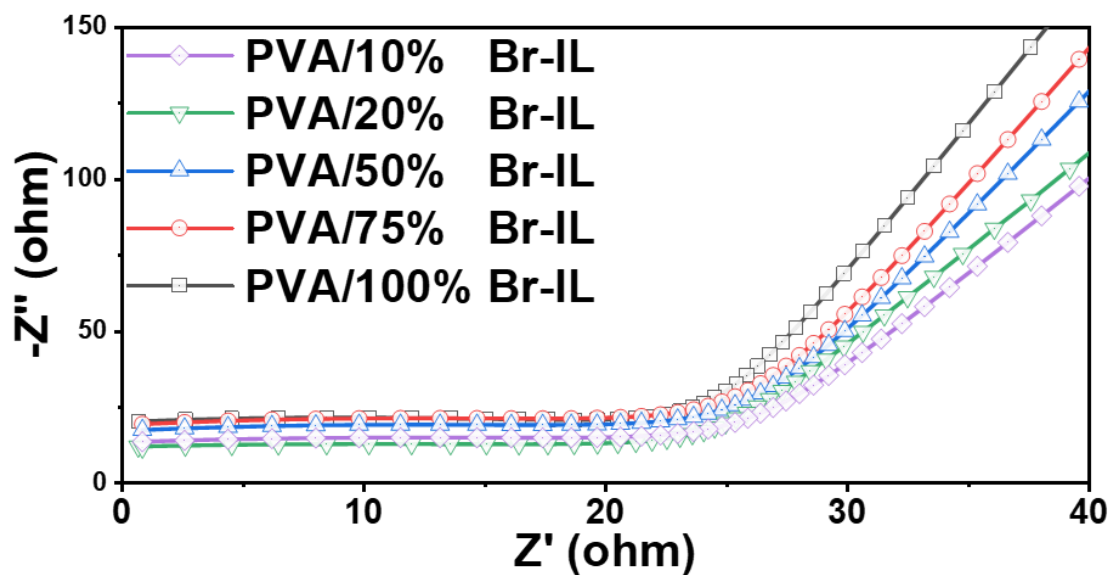

Figure S4. Impedance analyses on PVA films modified by different concentrations of Br-IL.

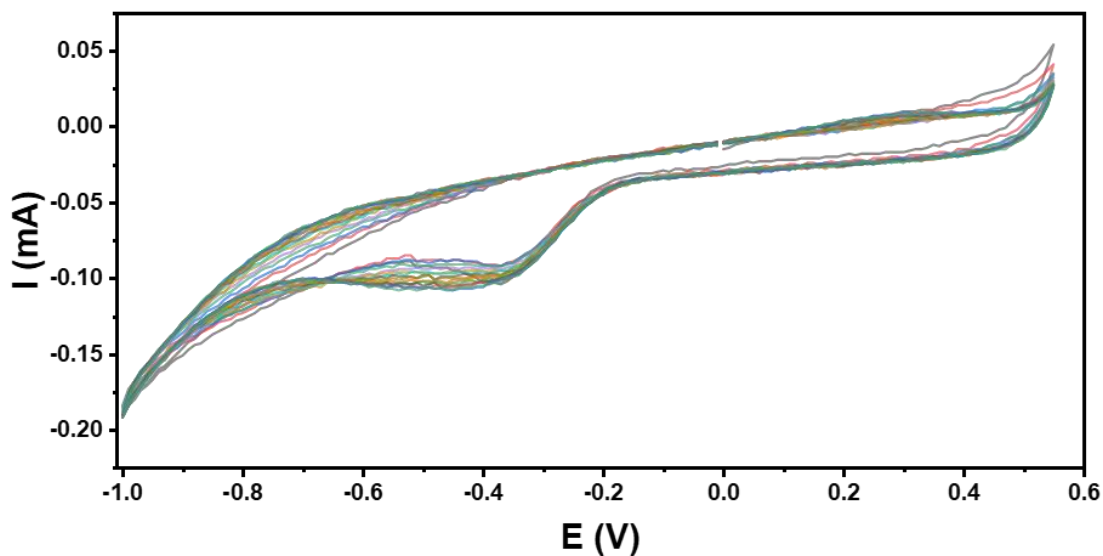

Figure S5. Cyclic voltammety measurement on PVA/100% Br-IL film.

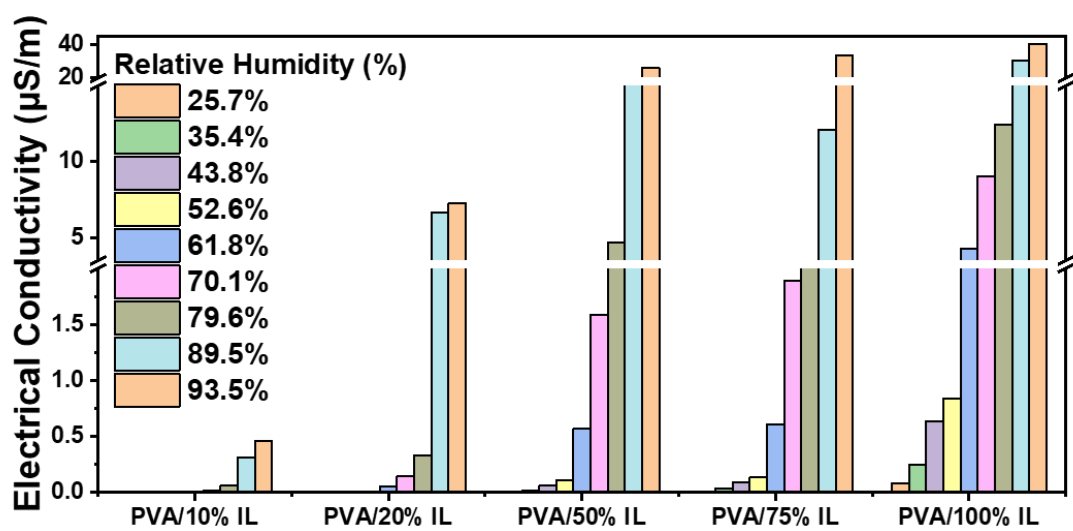

Figure S6. Electrical conductivity measurements on ionic conductive PVA films with different concentrations of Br-IL at various Relative Humidity.

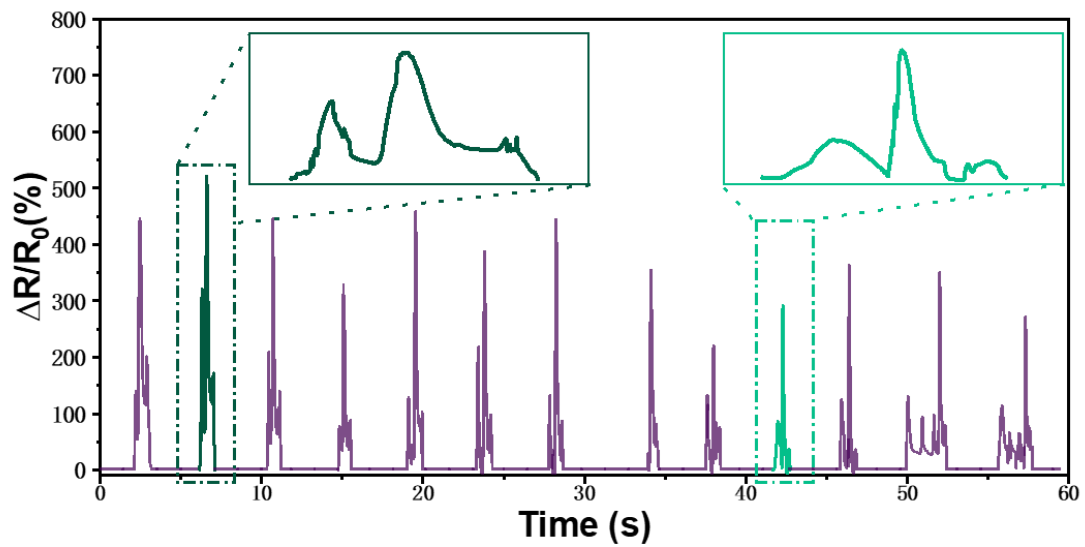

Figure S7. Swallowing signals from the PVA/Br-IL film

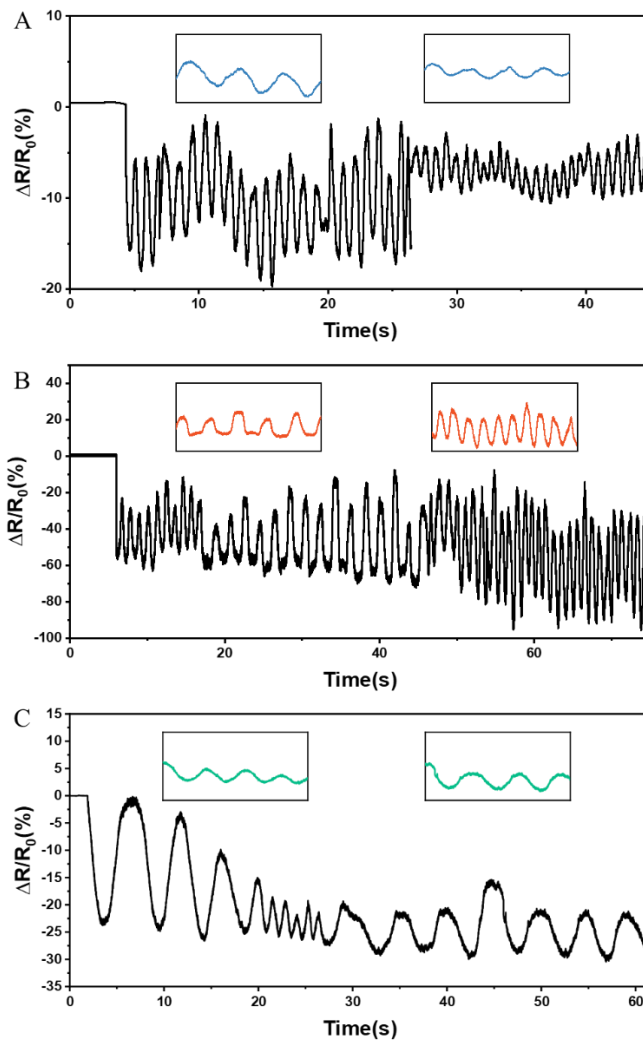

Figure S8. Relative resistance changes of PVA/Br-IL film during finger joint bending under different ambient temperatures. (A) 30°C. (B) 40°C. (C) 50°C.

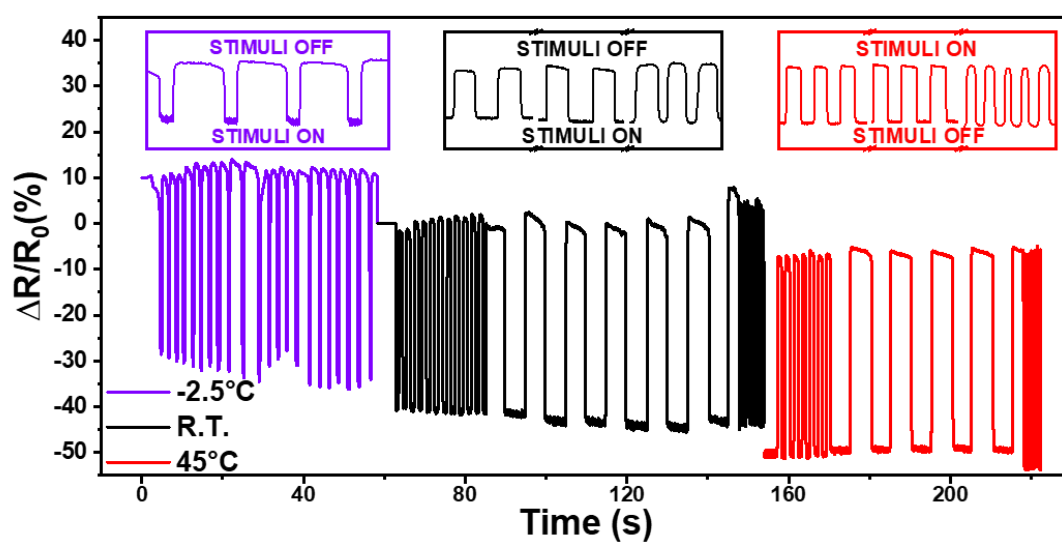

Figure S9. Relative resistance response to short-term temperature stimulations of PVA/Br-IL film under different ambient temperatures (-2.5°C, R.T. and 45 °C).

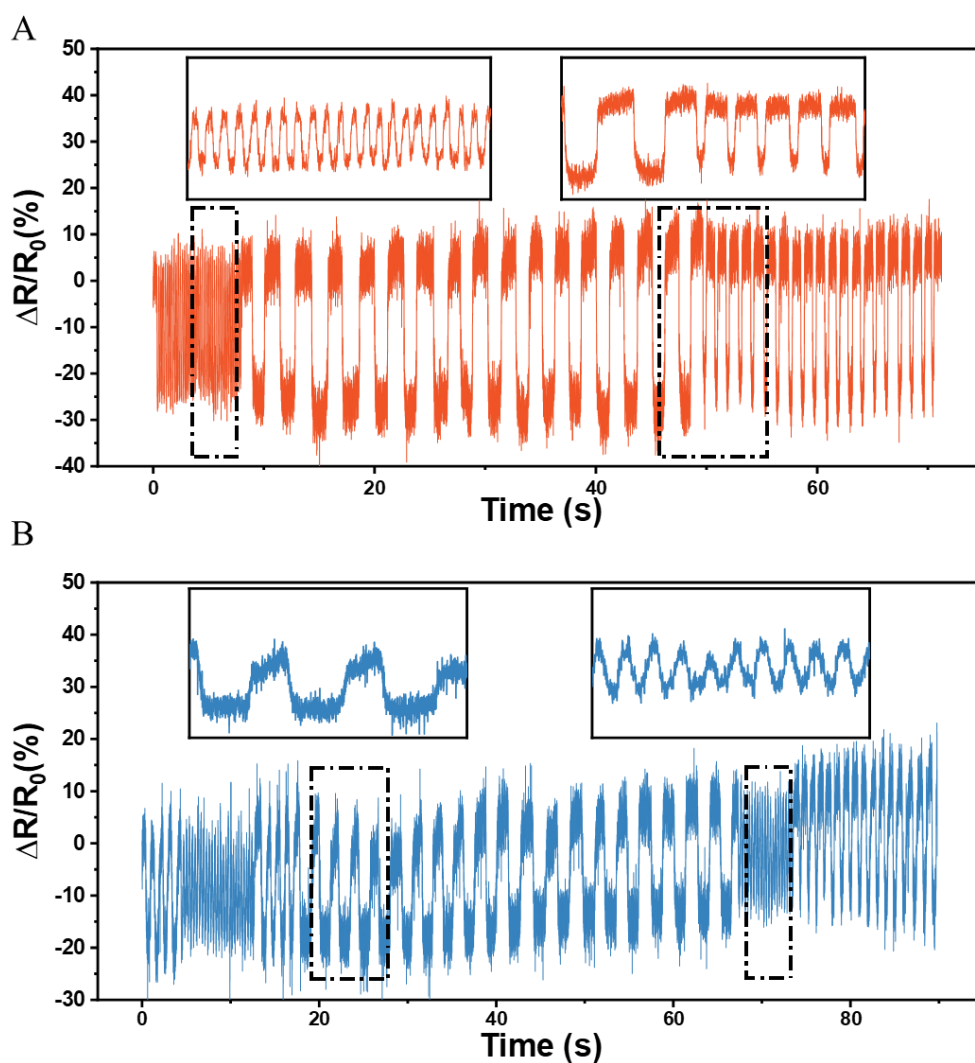

Figure S10. Relative resistance response to short-term temperature stimulations of PVA/Br-IL film under different ambient humidity. (A) 30% R.H. (B) 70% R.H.

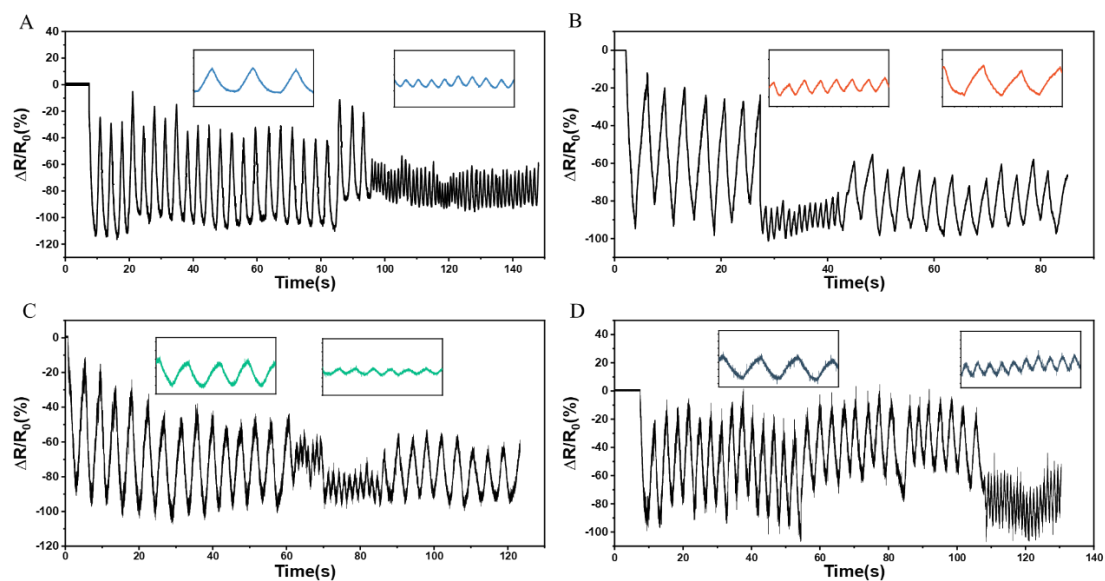

Figure S11. Relative resistance response to human nose breathes of PVA/Br-IL film under different sample temperatures. (A)  $-5^{\circ}\text{C}$ . (B)  $30^{\circ}\text{C}$ . (C)  $40^{\circ}\text{C}$ . (D)  $50^{\circ}\text{C}$ .

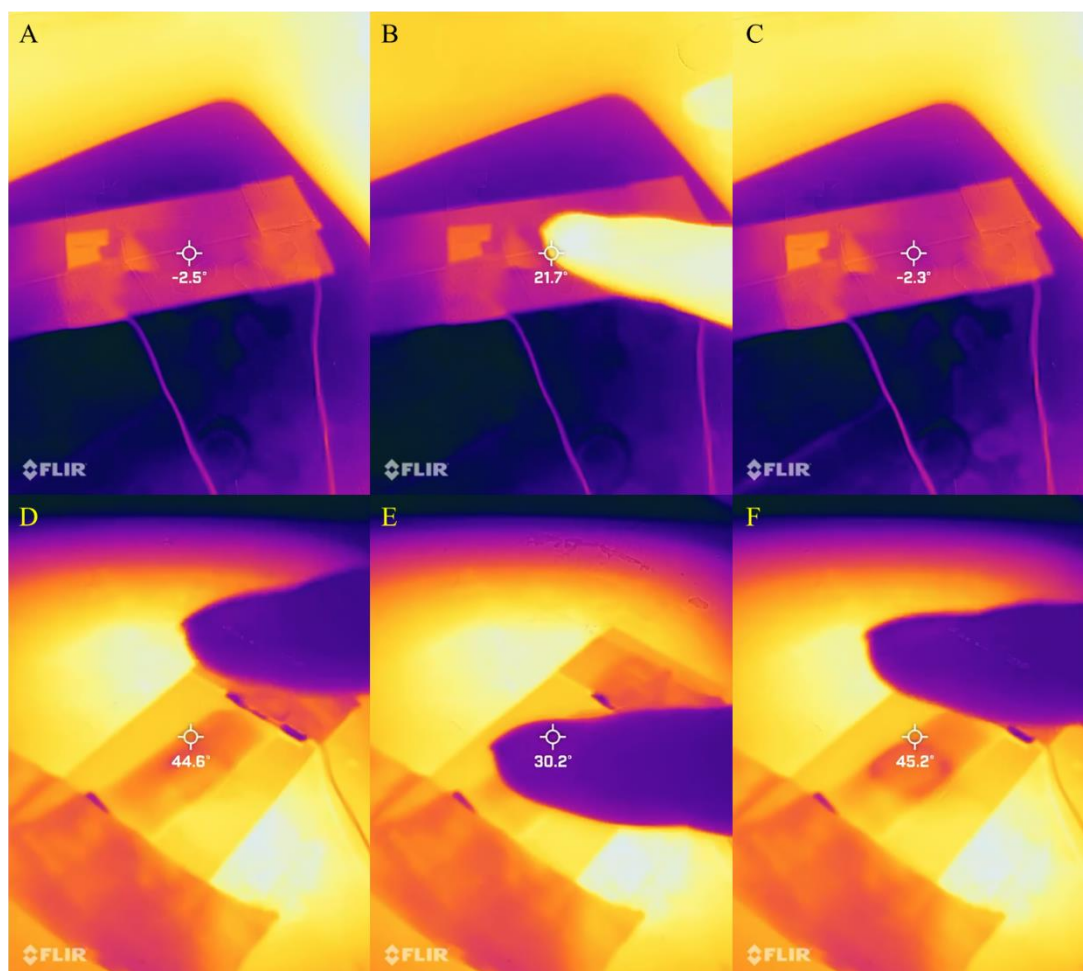

Figure S12. Thermal imaging figures of short-term temperature stimulations of PVA/Br-IL film captured by FLIR One Pro LT iOS Pro-Grade Thermal Camera. (A-C) Sample Temperatures  $-2.5^{\circ}\text{C}$ . (D-F) Sample Temperatures  $45^{\circ}\text{C}$ .



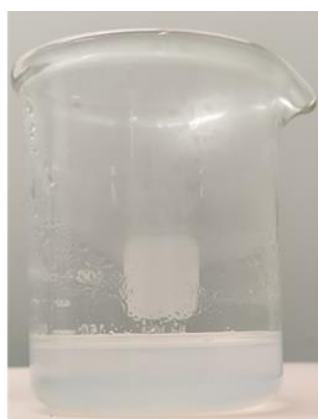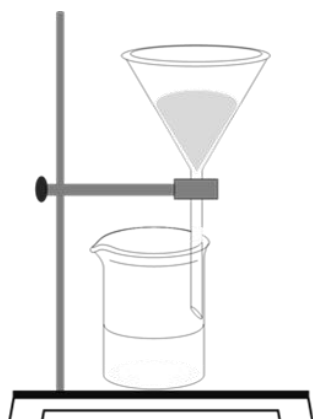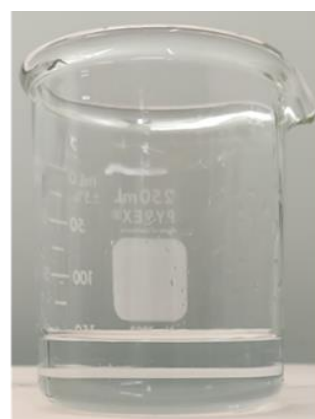

Contaminated  
PVA/Br-IL Solution

Filtration

Pure  
PVA/Br-IL Solution

Figure S13. Photographs of dissolving contaminated PVA/Br-IL film into hot water and after simple filtration, the solid undissolvable contamination was separated from PVA/Br-IL solution.

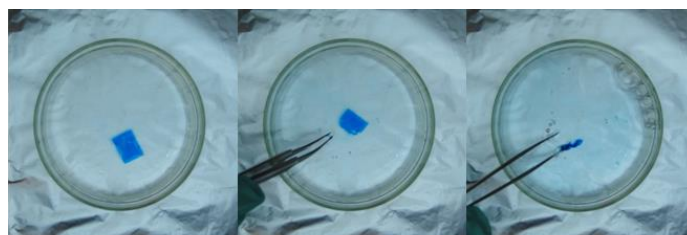

START

15 Seconds

30 Seconds

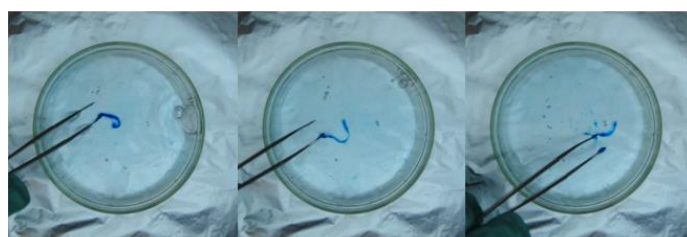

40 Seconds

50 Seconds

60 Seconds

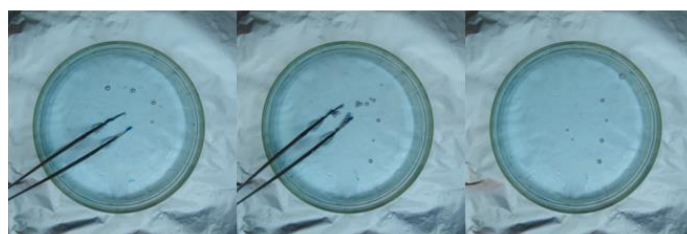

70 Seconds

80 Seconds

90 Seconds

Figure S14. Photographs of dissolving PVA/Br-IL film into hot DI water within 90 seconds.
